# Supplementary material
Source: publisher site journal article supplement (https://www.dovepress.com/article/417693)
Supplement: Supplementary file 1 [file get_supplementary_file.php]

Supplementary Table 1. Avoidable mortality rate from 2011 to 2021 in Kazakhstan.

| Year | **Preventable (Rate (95% CI))** | **Treatable (Rate (95% CI))** | **Avoidable (Rate (95% CI))** |
| --- | --- | --- | --- |
| 2011 | 132.28 (129.83 to 134.73) | 135.38 (132.91 to 137.85) | 267.62 (264.13 to 271.11) |
| 2012 | 99.23 (97.39 to 101.07) | 101.84 (99.96 to 103.72) | 201.04 (198.41 to 203.67) |
| 2013 | 78.77 (77.14 to 80.40) | 81.20 (79.53 to 82.87) | 159.94 (157.61 to 162.27) |
| 2014 | 78.47 (76.65 to 80.29) | 80.69 (78.83 to 82.55) | 159.10 (156.49 to 161.71) |
| 2015 | 76.27 (74.45 to 78.09) | 78.51 (76.67 to 80.35) | 154.74 (152.15 to 157.33) |
| 2016 | 71.20 (69.46 to 72.94) | 73.18 (71.42 to 74.94) | 144.36 (141.89 to 146.83) |
| 2017 | 68.61 (66.92 to 70.03) | 70.42 (68.71 to 72.13) | 138.95 (136.56 to 141.34) |
| 2018 | 66.02 (64.43 to 67.61) | 67.49 (65.88 to 69.10) | 133.44 (131.19 to 135.69) |
| 2019 | 62.61 (61.12 to 64.10) | 63.88 (62.37 to 65.39) | 126.41 (124.29 to 128.53) |
| 2020 | 71.82 (70.27 to 73.37) | 72.85 (71.28 to 74.42) | 144.60 (142.40 to 146.80) |
| 2021 | 82.46 (80.81 to 84.11) | 83.43 (81.78 to 85.08) | 165.86 (163.55 to 168.17) |

Supplementary Table 2. Avoidable mortality rate from 2011 to 2021 in Kazakhstan by disease and gender

| Diseases | Chronic rheumatic heart diseases | | Hypertensive diseases | | Ischemic heart diseases | | Cerebrovascular diseases | | Total | |
| --- | --- | --- | --- | --- | --- | --- | --- | --- | --- | --- |
| Year | Female | Male | Female | Male | Female | Male | Female | Male | Female | Male |
| 2011 | 3.39 (2.9 to 3.88) | 2.65 (2.18 to 3.12) | 16.76 (15.6 to 17.92) | 26.86 (25.14 to 28.58) | 73.47 (71.08 to 75.86) | 202.04 (197.36 to 206.72) | 85.93 (83.36 to 88.5) | 158.03 (153.78 to 162.28) | 179.55 (175.83 to 183.27) | 389.58 (382.99 to 396.17) |
| 2012 | 2.84 (2.41 to 3.27) | 2.33 (1.94 to 2.72) | 11.55 (10.69 to 12.41) | 16.87 (15.73 to 18.01) | 56.84 (54.94 to 58.74) | 143.8 (140.53 to 147.07) | 70.07 (67.97 to 72.17) | 106.98 (104.14 to 109.82) | 141.3 (138.3 to 144.3) | 269.99 (265.48 to 274.5) |
| 2013 | 2.71 (2.3 to 3.12) | 2.08 (1.71 to 2.45) | 7.93 (7.22 to 8.64) | 11.32 (10.4 to 12.24) | 42.72 (41.07 to 44.37) | 112.86 (109.98 to 115.74) | 57.24 (55.36 to 59.12) | 90.77 (88.16 to 93.38) | 110.59 (107.96 to 113.22) | 217.03 (213.03 to 221.03) |
| 2014 | 2.56 (2.15 to 2.97) | 1.76 (1.37 to 2.15) | 6.32 (5.63 to 7.01) | 10.27 (9.25 to 11.29) | 41.37 (39.61 to 43.13) | 123.52 (119.93 to 127.11) | 53.96 (51.98 to 55.94) | 99.2 (95.93 to 102.47) | 104.21 (101.45 to 106.97) | 234.75 (229.77 to 239.73) |
| 2015 | 2.25 (1.86 to 2.64) | 2.26 (1.79 to 2.73) | 6.11 (5.44 to 6.78) | 12.3 (11.14 to 13.46) | 39.37 (37.63 to 41.11) | 122.86 (119.27 to 126.45) | 51.91 (49.95 to 53.87) | 92.99 (89.8 to 96.18) | 99.64 (96.9 to 102.38) | 230.41 (225.45 to 235.37) |
| 2016 | 1.91 (1.56 to 2.26) | 2.07 (1.64 to 2.5) | 5.05 (4.44 to 5.66) | 9.28 (8.3 to 10.26) | 34.94 (33.31 to 36.57) | 118.33 (114.84 to 121.82) | 46.15 (44.31 to 47.99) | 92.36 (89.2 to 95.52) | 88.05 (85.48 to 90.62) | 222.04 (217.2 to 226.88) |
| 2017 | 1.64 (1.31 to 1.97) | 2.03 (1.6 to 2.46) | 3.52 (3.01 to 4.03) | 7.32 (6.48 to 8.16) | 33.16 (31.61 to 34.71) | 112.73 (109.36 to 116.1) | 45.12 (43.34 to 46.9) | 93.57 (90.45 to 96.69) | 83.44 (80.99 to 85.89) | 215.65 (210.97 to 220.33) |
| 2018 | 1.63 (1.32 to 1.94) | 1.23 (0.92 to 1.54) | 3.26 (2.79 to 3.73) | 6.57 (5.77 to 7.37) | 32.97 (31.46 to 34.48) | 111.08 (107.87 to 114.29) | 42.68 (41.01 to 44.35) | 87.23 (84.35 to 90.11) | 80.54 (78.23 to 82.85) | 206.11 (201.72 to 210.5) |
| 2019 | 1.37 (1.08 to 1.66) | 1.11 (0.82 to 1.4) | 3.18 (2.75 to 3.61) | 5.8 (5.09 to 6.51) | 29.87 (28.5 to 31.24) | 104.25 (101.27 to 107.23) | 40.51 (38.92 to 42.1) | 85.27 (82.53 to 88.01) | 74.92 (72.76 to 77.08) | 196.43 (192.31 to 200.55) |
| 2020 | 1.09 (0.84 to 1.34) | 0.91 (0.66 to 1.16) | 4.05 (3.56 to 4.54) | 8.6 (7.76 to 9.44) | 36 (34.55 to 37.45) | 116.79 (113.69 to 119.89) | 45.51 (43.9 to 47.12) | 98.29 (95.43 to 101.15) | 86.65 (84.42 to 88.88) | 224.59 (220.28 to 228.9) |
| 2021 | 1.18 (0.93 to 1.43) | 0.67 (0.45 to 0.89) | 5.27 (4.72 to 5.82) | 8.51 (7.67 to 9.35) | 53.24 (51.52 to 54.96) | 132.66 (129.39 to 135.93) | 49.75 (48.1 to 51.4) | 101.83 (98.99 to 104.67) | 109.45 (106.98 to 111.92) | 243.67 (239.24 to 248.1) |

Supplementary Table 3. Crude mortality from circulatory system (Chronic rheumatic heart disease (I05-I09); Hypertensive diseases (I10-I15); Ischaemic heart disease (I20-I25); [Cerebrovascular diseases](https://www.icd10data.com/ICD10CM/Codes/I00-I99/I60-I69) (I60-I69).)

|  | Age-group | gender | I10-I13,I15 | I20-I25 | I60-I69 | I05-I09 | Total |
| --- | --- | --- | --- | --- | --- | --- | --- |
|  | 1 | 2 | 3 | 4 | 5 | 6 | 7 |
|  | 2011 | | | | | | | |
| 2011 | 0-4 | male | 0,12(-0,11;0,35) | 0,24(-0,09;0,56) | 3,88(2,56;5,2) | 0,47(0,01;0,93) | 4,7(3,25;6,16) |
| female | 0,25(-0,1;0,59) | 0,25(-0,1;0,59) | 2,73(1,59;3,88) | 0,12(-0,12;0,37) | 3,36(2,09;4,62) |
| both | 0,18(-0,02;0,39) | 0,24(0;0,48) | 3,32(2,44;4,2) | 0,3(0,04;0,57) | 4,05(3,08;5,02) |
| 5-9 | male | 0(0;0) | 0,16(-0,15;0,47) | 0(0;0) | 0(0;0) | 0,16(-0,15;0,47) |
| female | 0(0;0) | 0(0;0) | 0,33(-0,13;0,79) | 0(0;0) | 0,33(-0,13;0,79) |
| both | 0(0;0) | 0,08(-0,08;0,24) | 0,16(-0,06;0,39) | 0(0;0) | 0,24(-0,03;0,52) |
| 10-14 | male | 0(0;0) | 0,17(-0,17;0,51) | 0(0;0) | 0,17(-0,17;0,51) | 0,34(-0,13;0,82) |
| female | 0,18(-0,17;0,53) | 0(0;0) | 0,36(-0,14;0,86) | 0(0;0) | 0,54(-0,07;1,15) |
| both | 0,09(-0,08;0,26) | 0,09(-0,08;0,26) | 0,18(-0,07;0,42) | 0,09(-0,08;0,26) | 0,44(0,05;0,83) |
| 15-19 | male | 0(0;0) | 0,28(-0,11;0,66) | 0,55(0,01;1,09) | 0,41(-0,05;0,88) | 1,24(0,43;2,05) |
| female | 0(0;0) | 0,57(0,01;1,13) | 1,14(0,35;1,92) | 0,14(-0,14;0,42) | 1,85(0,84;2,85) |
| both | 0(0;0) | 0,42(0,08;0,76) | 0,84(0,36;1,31) | 0,28(0,01;0,55) | 1,54(0,9;2,18) |
| 20-24 | male | 0,37(-0,05;0,78) | 0,98(0,3;1,65) | 2,44(1,37;3,51) | 0,12(-0,12;0,36) | 3,91(2,55;5,26) |
| female | 0,24(-0,09;0,57) | 1,08(0,37;1,79) | 1,08(0,37;1,79) | 0(0;0) | 2,4(1,35;3,46) |
| both | 0,3(0,04;0,57) | 1,03(0,54;1,52) | 1,76(1,12;2,4) | 0,06(-0,06;0,18) | 3,15(2,29;4,01) |
| 25-29 | male | 0,57(0,01;1,12) | 7,79(5,73;9,85) | 4,68(3,08;6,27) | 0,28(-0,11;0,68) | 13,32(10,63;16,01) |
| female | 0,28(-0,11;0,67) | 1,4(0,53;2,27) | 3,08(1,79;4,37) | 0,14(-0,13;0,41) | 4,9(3,28;6,53) |
| both | 0,42(0,08;0,76) | 4,58(3,47;5,69) | 3,87(2,85;4,9) | 0,21(-0,03;0,45) | 9,09(7,52;10,65) |
| 30-34 | male | 1,77(0,73;2,82) | 14,51(11,52;17,51) | 12,9(10,07;15,73) | 1,61(0,61;2,61) | 30,8(26,44;35,17) |
| female | 0,47(-0,06;1,01) | 3,47(2,02;4,91) | 6,93(4,88;8,98) | 0,95(0,19;1,7) | 11,81(9,14;14,49) |
| both | 1,12(0,53;1,7) | 8,93(7,27;10,58) | 9,88(8,14;11,62) | 1,28(0,65;1,9) | 21,2(18,65;23,74) |
| 35-39 | male | 4,96(3,12;6,8) | 42,53(37,15;47,91) | 25,52(21,35;29,69) | 1,77(0,67;2,87) | 74,78(67,65;81,92) |
| female | 1,01(0,2;1,81) | 8,56(6,21;10,91) | 10,07(7,52;12,62) | 2,35(1,12;3,58) | 21,99(18,23;25,76) |
| both | 2,93(1,95;3,92) | 25,09(22,21;27,97) | 17,59(15,17;20) | 2,07(1,24;2,9) | 47,68(43,7;51,65) |
| 40-44 | male | 6,36(4,19;8,53) | 73,08(65,72;80,44) | 42,81(37,18;48,44) | 1,54(0,47;2,61) | 123,79(114,22;133,37) |
| female | 3,44(1,89;4,98) | 14,84(11,63;18,05) | 20,81(17,01;24,61) | 1,81(0,69;2,93) | 40,9(35,56;46,23) |
| both | 4,85(3,53;6,17) | 43,03(39,11;46,96) | 31,46(28,1;34,82) | 1,68(0,9;2,46) | 81,03(75,64;86,42) |
| 45-49 | male | 17,02(13,46;20,58) | 134,81(124,8;144,82) | 83,75(75,86;91,64) | 5,03(3,1;6,96) | 240,61(227,24;253,98) |
| female | 6,81(4,67;8,95) | 25,33(21,2;29,45) | 40,35(35,14;45,55) | 2,1(0,91;3,28) | 74,58(67,51;81,66) |
| both | 11,66(9,63;13,68) | 77,28(72,06;82,5) | 60,94(56,31;65,58) | 3,49(2,38;4,6) | 153,36(146,01;160,72) |
| 50-54 | male | 34,2(28,8;39,6) | 266,94(251,85;282,03) | 148,13(136,89;159,37) | 4(2,15;5,84) | 453,27(433,61;472,94) |
| female | 16,7(13,19;20,21) | 55,09(48,72;61,47) | 81,97(74,19;89,74) | 6,14(4,01;8,27) | 159,91(149,05;170,77) |
| both | 24,81(21,68;27,95) | 153,31(145,53;161,1) | 112,64(105,97;119,32) | 5,15(3,72;6,58) | 295,92(285,1;306,74) |
| 55-59 | male | 54,9(46,81;62,99) | 406,32(384,32;428,33) | 267,99(250,12;285,86) | 6,51(3,73;9,3) | 735,72(706,11;765,33) |
| female | 33,48(27,85;39,1) | 109,54(99,36;119,72) | 129,23(118,18;140,29) | 9,35(6,38;12,33) | 281,6(265,28;297,92) |
| both | 42,96(38,2;47,71) | 240,86(229,59;252,12) | 190,63(180,6;200,65) | 8,1(6,03;10,16) | 482,53(466,58;498,48) |
| 60-64 | male | 88,1(75,95;100,25) | 658,59(625,37;691,8) | 471,48(443,37;499,58) | 9,16(5,24;13,08) | 1227,33(1181,98;1272,67) |
| female | 48,42(40,74;56,09) | 215,18(199,01;231,35) | 242,08(224,92;259,23) | 12,02(8,2;15,85) | 517,7(492,61;542,78) |
| both | 65,1(58,33;71,87) | 401,62(384,8;418,44) | 338,53(323,09;353,98) | 10,82(8,06;13,58) | 816,07(792,09;840,05) |
| 65-69 | male | 118,93(99,08;138,77) | 824,73(772,48;876,98) | 755,79(705,77;805,81) | 5,17(1,03;9,31) | 1704,61(1629,49;1779,74) |
| female | 87,17(73,4;100,94) | 352,07(324,4;379,74) | 388,29(359,24;417,35) | 11,32(6,36;16,28) | 838,85(796,14;881,56) |
| both | 99,76(88,32;111,2) | 539,44(512,84;566,05) | 533,98(507,5;560,45) | 8,88(5,47;12,3) | 1182,06(1142,67;1221,45) |
| 70-74 | male | 154,12(134,5;173,74) | 1177,05(1122,83;1231,28) | 1089,91(1037,73;1142,09) | 5,85(2,03;9,68) | 2426,94(2349,07;2504,8) |
| female | 110,02(97,29;122,75) | 608,01(578,08;637,93) | 685,44(653,67;717,22) | 9,58(5,83;13,34) | 1413,06(1367,44;1458,67) |
| both | 126,38(115,56;137,2) | 819,05(791,5;846,6) | 835,45(807,63;863,27) | 8,2(5,44;10,96) | 1789,08(1748,36;1829,79) |
| 2012 | 0-4 | male | 0(0;0) | 0(0;0) | 4,94(3,48;6,4) | 0,11(-0,11;0,33) | 5,05(3,58;6,53) |
| female | 0,12(-0,11;0,35) | 0,12(-0,11;0,35) | 3,8(2,48;5,12) | 0,12(-0,11;0,35) | 4,16(2,78;5,53) |
| both | 0,06(-0,06;0,17) | 0,06(-0,06;0,17) | 4,39(3,4;5,37) | 0,12(-0,04;0,28) | 4,62(3,6;5,63) |
| 5-9 | male | 0(0;0) | 0,15(-0,14;0,44) | 0,45(-0,06;0,95) | 0(0;0) | 0,6(0,01;1,18) |
| female | 0(0;0) | 0,16(-0,15;0,47) | 0,16(-0,15;0,47) | 0(0;0) | 0,31(-0,12;0,75) |
| both | 0(0;0) | 0,15(-0,06;0,37) | 0,31(0,01;0,61) | 0(0;0) | 0,46(0,09;0,83) |
| 10-14 | male | 0,18(-0,17;0,52) | 0(0;0) | 0,35(-0,14;0,84) | 0,18(-0,17;0,52) | 0,7(0,01;1,39) |
| female | 0,18(-0,18;0,54) | 0(0;0) | 0,37(-0,14;0,88) | 0,18(-0,18;0,54) | 0,73(0,01;1,45) |
| both | 0,18(-0,07;0,43) | 0(0;0) | 0,36(0,01;0,71) | 0,18(-0,07;0,43) | 0,72(0,22;1,21) |
| 15-19 | male | 0(0;0) | 0,86(0,17;1,55) | 0,86(0,17;1,55) | 0,14(-0,14;0,43) | 1,87(0,85;2,89) |
| female | 0,15(-0,14;0,44) | 0,3(-0,12;0,71) | 1,05(0,27;1,82) | 0,3(-0,12;0,71) | 1,8(0,78;2,81) |
| both | 0,07(-0,07;0,22) | 0,59(0,18;0,99) | 0,95(0,44;1,47) | 0,22(-0,03;0,47) | 1,83(1,11;2,55) |
| 20-24 | male | 0,12(-0,12;0,36) | 2,46(1,38;3,55) | 1,97(1,01;2,94) | 0,37(-0,05;0,79) | 4,93(3,4;6,46) |
|  | female | 0(0;0) | 0,61(0,07;1,14) | 1,7(0,81;2,59) | 0,24(-0,09;0,58) | 2,55(1,46;3,64) |
|  | both | 0,06(-0,06;0,18) | 1,53(0,93;2,13) | 1,83(1,18;2,49) | 0,31(0,04;0,57) | 3,73(2,79;4,67) |
| 25-29 | male | 0,41(-0,05;0,87) | 5,57(3,87;7,28) | 5,57(3,87;7,28) | 0,14(-0,13;0,4) | 11,68(9,22;14,15) |
| female | 0,67(0,08;1,26) | 1,88(0,89;2,86) | 2,95(1,72;4,18) | 0,27(-0,1;0,64) | 5,77(4,04;7,49) |
| both | 0,54(0,17;0,91) | 3,71(2,73;4,69) | 4,25(3,2;5,3) | 0,2(-0,03;0,43) | 8,71(7,2;10,21) |
| 30-34 | male | 1,27(0,39;2,16) | 14,98(11,95;18,01) | 10,2(7,7;12,7) | 1,43(0,5;2,37) | 27,89(23,76;32,02) |
| female | 0,62(0,01;1,24) | 5(3,27;6,73) | 4,53(2,88;6,18) | 0,31(-0,12;0,75) | 10,46(7,96;12,97) |
| both | 0,95(0,41;1,48) | 9,94(8,2;11,67) | 7,34(5,84;8,83) | 0,87(0,35;1,38) | 19,09(16,68;21,49) |
| 35-39 | male | 2,28(1,04;3,51) | 34,67(29,84;39,5) | 20,84(17,1;24,58) | 1,93(0,79;3,06) | 59,72(53,38;66,06) |
| female | 1,16(0,3;2,02) | 7,96(5,71;10,21) | 10,45(7,87;13,03) | 1,49(0,52;2,47) | 21,06(17,4;24,72) |
| both | 1,7(0,96;2,45) | 20,95(18,34;23,57) | 15,5(13,25;17,75) | 1,7(0,96;2,45) | 39,86(36,25;43,47) |
| 40-44 | male | 4,96(3,05;6,86) | 64,24(57,39;71,1) | 40,03(34,62;45,45) | 1,53(0,47;2,58) | 110,76(101,75;119,77) |
| female | 1,79(0,68;2,9) | 12,89(9,91;15,86) | 17,54(14,07;21,01) | 1,43(0,44;2,42) | 33,65(28,84;38,46) |
| both | 3,32(2,24;4,41) | 37,76(34,1;41,42) | 28,43(25,26;31,61) | 1,48(0,75;2,2) | 70,99(65,97;76,01) |
| 45-49 | male | 11,57(8,62;14,52) | 128,06(118,24;137,89) | 74,33(66,84;81,81) | 2,94(1,45;4,43) | 216,9(204,12;229,69) |
| female | 6,21(4,15;8,26) | 24,65(20,55;28,75) | 39,02(33,86;44,17) | 2,84(1,45;4,23) | 72,71(65,67;79,75) |
| both | 8,75(6,98;10,52) | 73,76(68,62;78,9) | 55,78(51,32;60,25) | 2,89(1,87;3,9) | 141,18(134,08;148,29) |
| 50-54 | male | 23,68(19,28;28,09) | 228,08(214,41;241,75) | 139,75(129,05;150,45) | 6,19(3,94;8,44) | 397,7(379,64;415,75) |
| female | 9,81(7,17;12,45) | 49,05(43,14;54,95) | 76,07(68,72;83,43) | 5,74(3,72;7,76) | 140,67(130,67;150,67) |
| both | 16,25(13,77;18,74) | 132,21(125,12;139,31) | 105,65(99,31;111,99) | 5,95(4,44;7,45) | 260,06(250,11;270,01) |
| 55-59 | male | 48,12(40,69;55,56) | 385,28(364,24;406,31) | 229,85(213,61;246,1) | 6,28(3,59;8,96) | 669,53(641,8;697,25) |
| female | 22,64(18,09;27,19) | 84,13(75,35;92,9) | 124,17(113,5;134,83) | 5,48(3,24;7,72) | 236,42(221,71;251,13) |
| both | 33,95(29,79;38,1) | 217,73(207,19;228,26) | 171,05(161,72;180,39) | 5,83(4,11;7,56) | 428,56(413,78;443,33) |
| 60-64 | male | 72,83(62,13;83,53) | 598,2(567,53;628,86) | 443,94(417,53;470,36) | 6,55(3,34;9,75) | 1121,52(1079,53;1163,5) |
| female | 40,59(33,8;47,39) | 192,3(177,51;207,1) | 218,67(202,9;234,45) | 11,56(7,93;15,18) | 463,13(440,17;486,09) |
| both | 54,13(48,16;60,11) | 362,78(347,31;378,26) | 313,29(298,91;327,67) | 9,45(6,95;11,95) | 739,66(717,56;761,76) |
| 65-69 | male | 108,54(89,44;127,65) | 783,45(732,12;834,77) | 658,27(611,22;705,32) | 3,5(0,07;6,93) | 1553,76(1481,48;1626,04) |
| female | 70,83(58,26;83,4) | 322,82(295,98;349,65) | 360,56(332,2;388,91) | 12,77(7,44;18,11) | 766,98(725,62;808,34) |
| both | 85,87(75,14;96,6) | 506,5(480,44;532,57) | 479,28(453,93;504,63) | 9,08(5,59;12,56) | 1080,73(1042,66;1118,8) |
| 70-74 | male | 127,23(109,05;145,42) | 1044,26(992,16;1096,37) | 1006,36(955,21;1057,51) | 10,83(5,52;16,13) | 2188,68(2113,25;2264,12) |
| female | 93,17(81,33;105,01) | 550,01(521,25;578,77) | 629,87(599,1;660,65) | 7,44(4,09;10,78) | 1280,5(1236,61;1324,38) |
| both | 105,65(95,62;115,69) | 731,14(704,74;757,53) | 767,84(740,79;794,89) | 8,68(5,8;11,56) | 1613,31(1574,11;1652,52) |
| 2013 | 0-4 | male | 0(0;0) | 0,22(-0,08;0,52) | 4(2,71;5,29) | 0,11(-0,1;0,32) | 4,32(2,98;5,66) |
| female | 0(0;0) | 0,11(-0,11;0,34) | 4,11(2,77;5,45) | 0(0;0) | 4,22(2,86;5,58) |
| both | 0(0;0) | 0,17(-0,02;0,35) | 4,05(3,12;4,98) | 0,06(-0,05;0,16) | 4,27(3,32;5,23) |
| 5-9 | male | 0(0;0) | 0(0;0) | 0(0;0) | 0(0;0) | 0(0;0) |
| female | 0(0;0) | 0(0;0) | 0,15(-0,14;0,44) | 0(0;0) | 0,15(-0,14;0,44) |
| both | 0(0;0) | 0(0;0) | 0,07(-0,07;0,21) | 0(0;0) | 0,07(-0,07;0,21) |
| 10-14 | male | 0(0;0) | 0(0;0) | 0,87(0,11;1,63) | 0(0;0) | 0,87(0,11;1,63) |
| female | 0(0;0) | 0(0;0) | 0,55(-0,07;1,17) | 0(0;0) | 0,55(-0,07;1,17) |
| both | 0(0;0) | 0(0;0) | 0,71(0,22;1,21) | 0(0;0) | 0,71(0,22;1,21) |
| 15-19 | male | 0(0;0) | 0,3(-0,12;0,72) | 1,22(0,37;2,06) | 0,15(-0,15;0,45) | 1,67(0,68;2,66) |
| female | 0(0;0) | 0(0;0) | 0,79(0,1;1,49) | 0(0;0) | 0,79(0,1;1,49) |
| both | 0(0;0) | 0,16(-0,06;0,37) | 1,01(0,46;1,56) | 0,08(-0,07;0,23) | 1,24(0,63;1,85) |
| 20-24 | male | 0,13(-0,12;0,37) | 1,63(0,74;2,52) | 1,63(0,74;2,52) | 0,13(-0,12;0,37) | 3,51(2,21;4,81) |
| female | 0,12(-0,12;0,37) | 0,25(-0,1;0,59) | 1,62(0,74;2,49) | 0,25(-0,1;0,59) | 2,24(1,2;3,27) |
| both | 0,12(-0,05;0,3) | 0,94(0,46;1,41) | 1,62(1;2,25) | 0,19(-0,02;0,4) | 2,87(2,04;3,7) |
| 25-29 | male | 0,26(-0,1;0,62) | 5,49(3,83;7,16) | 3,27(1,99;4,55) | 0,26(-0,1;0,62) | 9,29(7,13;11,45) |
| female | 0(0;0) | 1,55(0,67;2,42) | 1,16(0,4;1,92) | 0,9(0,23;1,57) | 3,61(2,27;4,95) |
| both | 0,13(-0,05;0,31) | 3,51(2,57;4,44) | 2,21(1,47;2,95) | 0,58(0,2;0,97) | 6,43(5,16;7,69) |
| 30-34 | male | 0,78(0,1;1,46) | 11,85(9,18;14,51) | 8,57(6,31;10,84) | 0,31(-0,12;0,74) | 21,51(17,92;25,1) |
| female | 0,31(-0,12;0,73) | 3,98(2,45;5,5) | 3,82(2,32;5,32) | 0,46(-0,06;0,98) | 8,56(6,32;10,8) |
| both | 0,54(0,14;0,94) | 7,87(6,35;9,4) | 6,18(4,82;7,53) | 0,39(0,05;0,72) | 14,97(12,87;17,08) |
| 35-39 | male | 2,78(1,42;4,15) | 24,7(20,64;28,76) | 19,48(15,87;23,09) | 1,04(0,21;1,88) | 48,01(42,34;53,67) |
| female | 0,99(0,2;1,79) | 5,62(3,73;7,51) | 8,93(6,55;11,31) | 1,16(0,3;2,01) | 16,69(13,44;19,95) |
| both | 1,86(1,09;2,64) | 14,92(12,71;17,12) | 14,07(11,93;16,21) | 1,1(0,5;1,7) | 31,95(28,73;35,18) |
| 40-44 | male | 3,76(2,11;5,41) | 49,08(43,12;55,03) | 30,65(25,95;35,36) | 1,88(0,71;3,05) | 85,37(77,52;93,22) |
| female | 1,58(0,55;2,62) | 11,08(8,34;13,81) | 19,34(15,73;22,96) | 1,58(0,55;2,62) | 33,58(28,82;38,35) |
| both | 2,64(1,68;3,59) | 29,44(26,23;32,65) | 24,81(21,86;27,75) | 1,73(0,95;2,5) | 58,61(54,08;63,13) |
| 45-49 | male | 7,98(5,5;10,45) | 97,11(88,49;105,74) | 66,01(58,89;73,12) | 2,99(1,48;4,5) | 174,09(162,54;185,64) |
| female | 3,62(2,03;5,21) | 17,19(13,73;20,65) | 31,13(26,47;35,78) | 2,17(0,94;3,4) | 54,11(47,98;60,24) |
| both | 5,69(4,25;7,13) | 55,22(50,73;59,7) | 47,72(43,55;51,89) | 2,56(1,6;3,53) | 111,19(104,82;117,56) |
| 50-54 | male | 16,8(13,14;20,46) | 183,81(171,71;195,91) | 114,31(104,77;123,86) | 5,6(3,49;7,71) | 320,53(304,54;336,51) |
| female | 7,56(5,28;9,85) | 34,93(30,02;39,85) | 60,5(54,03;66,97) | 4,86(3,03;6,7) | 107,85(99,22;116,49) |
| both | 11,86(9,76;13,95) | 104,11(97,9;110,32) | 85,5(79,88;91,13) | 5,21(3,82;6,59) | 206,67(197,92;215,42) |
| 55-59 | male | 27,74(22,22;33,27) | 302,32(284,1;320,55) | 213,66(198,33;228,98) | 6,58(3,89;9,27) | 550,3(525,71;574,89) |
| female | 16,1(12,33;19,87) | 64,84(57,28;72,41) | 99,57(90,19;108,94) | 6,44(4,05;8,82) | 186,94(174,09;199,79) |
| both | 21,29(18,06;24,52) | 170,68(161,54;179,82) | 150,41(141,83;158,99) | 6,5(4,72;8,28) | 348,88(335,81;361,95) |
| 60-64 | male | 49,36(40,71;58,01) | 469,51(442,83;496,2) | 365,66(342,11;389,21) | 5,53(2,63;8,42) | 890,06(853,32;926,81) |
| female | 31,05(25,22;36,87) | 143,27(130,75;155,79) | 183,43(169,26;197,6) | 8,54(5,49;11,6) | 366,29(346,27;386,31) |
| both | 38,72(33,76;43,68) | 279,98(266,64;293,32) | 259,79(246,94;272,64) | 7,28(5,13;9,43) | 585,77(566,48;605,07) |
| 65-69 | male | 72,39(57,44;87,35) | 604,88(561,65;648,11) | 573,51(531,41;615,61) | 8,85(3,62;14,08) | 1259,63(1197,24;1322,02) |
| female | 50,97(40,67;61,27) | 254,85(231,81;277,89) | 300,94(275,9;325,97) | 13,01(7,81;18,22) | 619,77(583,84;655,7) |
| both | 59,6(50,98;68,21) | 395,79(373,6;417,99) | 410,69(388,09;433,3) | 11,34(7,58;15,09) | 877,42(844,38;910,46) |
| 70-74 | male | 87,95(72,21;103,69) | 832,59(784,17;881,01) | 820,86(772,79;868,94) | 3,66(0,45;6,88) | 1745,06(1674,97;1815,16) |
| female | 55,07(45,71;64,43) | 399,13(373,93;424,32) | 491,04(463,1;518,99) | 9,11(5,3;12,92) | 954,34(915,38;993,31) |
| both | 66,94(58,69;75,18) | 555,6(531,84;579,36) | 610,1(585,2;635) | 7,14(4,45;9,84) | 1239,78(1204,29;1275,28) |
| 2014 | 0-4 | male | 0,21(-0,08;0,51) | 0,21(-0,08;0,51) | 4,66(3,28;6,03) | 0,21(-0,08;0,51) | 5,29(3,83;6,76) |
| female | 0,11(-0,11;0,33) | 0(0;0) | 2,35(1,35;3,36) | 0,11(-0,11;0,33) | 2,58(1,52;3,63) |
| both | 0,16(-0,02;0,35) | 0,11(-0,04;0,26) | 3,54(2,68;4,4) | 0,16(-0,02;0,35) | 3,97(3,06;4,89) |
| 5-9 | male | 0(0;0) | 0(0;0) | 0,39(-0,05;0,84) | 0(0;0) | 0,39(-0,05;0,84) |
| female | 0(0;0) | 0(0;0) | 0,28(-0,11;0,66) | 0(0;0) | 0,28(-0,11;0,66) |
| both | 0(0;0) | 0(0;0) | 0,34(0,04;0,63) | 0(0;0) | 0,34(0,04;0,63) |
| 10-14 | male | 0(0;0) | 0(0;0) | 0,51(-0,07;1,09) | 0(0;0) | 0,51(-0,07;1,09) |
| female | 0(0;0) | 0,18(-0,17;0,53) | 0(0;0) | 0(0;0) | 0,18(-0,17;0,53) |
| both | 0(0;0) | 0,09(-0,08;0,26) | 0,26(-0,03;0,56) | 0(0;0) | 0,35(0,01;0,69) |
| 15-19 | male | 0(0;0) | 0,8(0,1;1,5) | 1,27(0,39;2,16) | 0,16(-0,15;0,47) | 2,23(1,06;3,4) |
| female | 0(0;0) | 0(0;0) | 1,33(0,41;2,25) | 0(0;0) | 1,33(0,41;2,25) |
| both | 0(0;0) | 0,41(0,05;0,76) | 1,3(0,66;1,94) | 0,08(-0,08;0,24) | 1,79(1,04;2,54) |
| 20-24 | male | 0,13(-0,12;0,38) | 0,77(0,15;1,39) | 1,55(0,67;2,42) | 0,13(-0,12;0,38) | 2,58(1,45;3,7) |
| female | 0(0;0) | 0(0;0) | 1,16(0,4;1,92) | 0(0;0) | 1,16(0,4;1,92) |
| both | 0,06(-0,06;0,19) | 0,39(0,08;0,7) | 1,35(0,78;1,93) | 0,06(-0,06;0,19) | 1,87(1,19;2,55) |
| 25-29 | male | 0,25(-0,1;0,6) | 2,66(1,52;3,8) | 2,53(1,42;3,64) | 0(0;0) | 5,45(3,82;7,08) |
| female | 0,12(-0,12;0,37) | 1,49(0,65;2,33) | 0,87(0,23;1,51) | 0,12(-0,12;0,37) | 2,61(1,49;3,73) |
| both | 0,19(-0,02;0,4) | 2,07(1,36;2,78) | 1,69(1,05;2,33) | 0,06(-0,06;0,19) | 4,02(3,03;5) |
| 30-34 | male | 0,61(0,01;1,21) | 8,08(5,91;10,26) | 8,08(5,91;10,26) | 0,46(-0,06;0,97) | 17,23(14,05;20,41) |
| female | 0,75(0,09;1,41) | 1,95(0,89;3,01) | 2,25(1,11;3,38) | 0,6(0,01;1,19) | 5,54(3,76;7,33) |
| both | 0,68(0,24;1,12) | 4,99(3,78;6,19) | 5,14(3,92;6,36) | 0,53(0,14;0,92) | 11,33(9,52;13,15) |
| 35-39 | male | 0,86(0,11;1,61) | 23,14(19,23;27,04) | 16,62(13,32;19,93) | 0,17(-0,16;0,51) | 40,79(35,61;45,97) |
| female | 0,16(-0,16;0,48) | 6,37(4,37;8,37) | 8(5,76;10,24) | 0,49(-0,06;1,04) | 15,02(11,95;18,09) |
| both | 0,5(0,1;0,9) | 14,55(12,39;16,71) | 12,21(10,23;14,19) | 0,33(0,01;0,66) | 27,6(24,62;30,57) |
| 40-44 | male | 4,47(2,68;6,26) | 43,38(37,81;48,95) | 32,95(28,1;37,81) | 1,49(0,46;2,52) | 82,29(74,62;89,97) |
| female | 1,56(0,54;2,59) | 9,04(6,58;11,49) | 15,64(12,41;18,87) | 1,56(0,54;2,59) | 27,81(23,5;32,12) |
| both | 2,97(1,95;3,98) | 25,62(22,64;28,59) | 24(21,12;26,88) | 1,53(0,8;2,25) | 54,11(49,79;58,44) |
| 45-49 | male | 8,07(5,57;10,58) | 86,38(78,2;94,57) | 56,31(49,7;62,92) | 1,61(0,5;2,73) | 152,38(141,51;163,25) |
| female | 3,66(2,06;5,27) | 15,02(11,77;18,28) | 28,77(24,27;33,27) | 2,93(1,5;4,37) | 50,39(44,43;56,34) |
| both | 5,76(4,3;7,22) | 48,98(44,73;53,23) | 41,87(37,94;45,8) | 2,3(1,38;3,23) | 98,92(92,88;104,96) |
| 50-54 | male | 14,24(10,91;17,58) | 152,81(141,88;163,73) | 102,34(93,4;111,29) | 3,26(1,66;4,85) | 272,65(258,05;287,25) |
| female | 7,27(5,04;9,49) | 24,81(20,7;28,92) | 59,19(52,84;65,54) | 3,37(1,85;4,88) | 94,64(86,61;102,66) |
| both | 10,51(8,56;12,47) | 84,4(78,85;89,94) | 79,28(73,91;84,65) | 3,32(2,22;4,41) | 177,51(169,47;185,54) |
| 55-59 | male | 24,65(19,58;29,71) | 254,85(238,57;271,13) | 182(168,24;195,76) | 5,15(2,83;7,46) | 466,64(444,6;488,67) |
| female | 9,65(6,8;12,5) | 57,67(50,7;64,65) | 89,47(80,79;98,15) | 8,77(6,05;11,49) | 165,57(153,76;177,38) |
| both | 16,36(13,6;19,12) | 145,9(137,66;154,14) | 130,87(123,07;138,68) | 7,15(5,33;8,97) | 300,27(288,45;312,1) |
| 60-64 | male | 29,25(22,72;35,79) | 408,81(384,38;433,24) | 299,01(278,12;319,9) | 4,18(1,71;6,65) | 741,25(708,36;774,15) |
| female | 18,43(14,02;22,84) | 114,7(103,69;125,7) | 140,83(128,63;153,02) | 8,53(5,52;11,53) | 282,48(265,2;299,75) |
| both | 22,97(19,22;26,73) | 238,2(226,12;250,29) | 207,25(195,98;218,52) | 6,7(4,67;8,73) | 475,13(458,07;492,2) |
| 65-69 | male | 56,65(44,31;68,99) | 596,57(556,54;636,61) | 497,96(461,38;534,54) | 8,39(3,64;13,14) | 1159,58(1103,76;1215,4) |
| female | 28,36(21,24;35,47) | 238,93(218,28;259,59) | 264,5(242,77;286,23) | 11,16(6,69;15,62) | 542,94(511,8;574,08) |
| both | 39,65(33,13;46,18) | 381,73(361,49;401,97) | 357,71(338,13;377,3) | 10,05(6,77;13,34) | 789,15(760,05;818,25) |
| 70-74 | male | 41,34(29,76;52,91) | 625,15(580,14;670,17) | 602,37(558,19;646,56) | 4,22(0,52;7,92) | 1273,08(1208,85;1337,32) |
| female | 47,05(37,78;56,32) | 314,61(290,65;338,58) | 383,05(356,6;409,49) | 4,75(1,81;7,7) | 749,46(712,47;786,45) |
| both | 44,99(37,74;52,24) | 426,51(404,19;448,83) | 462,08(438,85;485,31) | 4,56(2,25;6,87) | 938,14(905,04;971,24) |
| 2015 | 0-4 | male | 0(0;0) | 0(0;0) | 3,56(2,38;4,74) | 0,1(-0,1;0,3) | 3,66(2,46;4,86) |
| female | 0(0;0) | 0(0;0) | 2,69(1,64;3,75) | 0(0;0) | 2,69(1,64;3,75) |
| both | 0(0;0) | 0(0;0) | 3,14(2,34;3,93) | 0,05(-0,05;0,15) | 3,19(2,39;3,99) |
| 5-9 | male | 0(0;0) | 0(0;0) | 0,24(-0,09;0,56) | 0(0;0) | 0,24(-0,09;0,56) |
| female | 0(0;0) | 0(0;0) | 0,13(-0,12;0,37) | 0(0;0) | 0,13(-0,12;0,37) |
| both | 0(0;0) | 0(0;0) | 0,18(-0,02;0,39) | 0(0;0) | 0,18(-0,02;0,39) |
| 10-14 | male | 0(0;0) | 0(0;0) | 0(0;0) | 0(0;0) | 0(0;0) |
| female | 0(0;0) | 0,17(-0,16;0,49) | 0,83(0,1;1,56) | 0(0;0) | 0,99(0,2;1,79) |
| both | 0(0;0) | 0,08(-0,08;0,24) | 0,4(0,05;0,76) | 0(0;0) | 0,48(0,1;0,87) |
| 15-19 | male | 0(0;0) | 0,34(-0,13;0,82) | 0,86(0,11;1,62) | 0(0;0) | 1,21(0,31;2,1) |
| female | 0(0;0) | 0(0;0) | 0,9(0,11;1,69) | 0(0;0) | 0,9(0,11;1,69) |
| both | 0(0;0) | 0,18(-0,07;0,42) | 0,88(0,33;1,43) | 0(0;0) | 1,06(0,46;1,65) |
| 20-24 | male | 0(0;0) | 1,25(0,43;2,06) | 1,38(0,53;2,24) | 0(0;0) | 2,63(1,45;3,81) |
| female | 0(0;0) | 0,14(-0,14;0,42) | 0,71(0,09;1,33) | 0,14(-0,14;0,42) | 0,99(0,26;1,73) |
| both | 0(0;0) | 0,7(0,27;1,14) | 1,05(0,52;1,58) | 0,07(-0,07;0,21) | 1,82(1,12;2,52) |
| 25-29 | male | 0(0;0) | 3,1(1,88;4,31) | 2,6(1,49;3,72) | 0,12(-0,12;0,37) | 5,82(4,16;7,49) |
| female | 0,12(-0,12;0,36) | 0,85(0,22;1,48) | 2,06(1,08;3,04) | 0(0;0) | 3,03(1,84;4,21) |
| both | 0,06(-0,06;0,18) | 1,96(1,28;2,64) | 2,33(1,59;3,07) | 0,06(-0,06;0,18) | 4,41(3,39;5,43) |
| 30-34 | male | 0,43(-0,06;0,92) | 8,32(6,18;10,46) | 6,17(4,32;8,01) | 0,43(-0,06;0,92) | 15,35(12,44;18,25) |
| female | 0,42(-0,06;0,9) | 2,25(1,15;3,35) | 3,94(2,48;5,4) | 0,42(-0,06;0,9) | 7,03(5,08;8,98) |
| both | 0,43(0,09;0,77) | 5,25(4,06;6,45) | 5,04(3,87;6,21) | 0,43(0,09;0,77) | 11,15(9,41;12,89) |
| 35-39 | male | 2,16(0,98;3,33) | 20,41(16,8;24,02) | 15,43(12,3;18,57) | 0,66(0,01;1,31) | 38,66(33,7;43,63) |
| female | 0,64(0,01;1,27) | 2,4(1,18;3,61) | 5,75(3,87;7,63) | 0,16(-0,15;0,47) | 8,95(6,61;11,3) |
| both | 1,38(0,73;2,04) | 11,24(9,36;13,11) | 10,5(8,69;12,31) | 0,41(0,05;0,76) | 23,53(20,82;26,24) |
| 40-44 | male | 5,12(3,22;7,02) | 40,06(34,75;45,36) | 29,63(25,07;34,2) | 0,37(-0,14;0,87) | 75,18(67,91;82,45) |
| female | 1,19(0,31;2,07) | 5,61(3,7;7,53) | 13,44(10,48;16,41) | 0,68(0,01;1,35) | 20,93(17,23;24,63) |
| both | 3,09(2,06;4,11) | 22,21(19,47;24,96) | 21,24(18,56;23,93) | 0,53(0,11;0,95) | 47,07(43,08;51,06) |
| 45-49 | male | 7,83(5,38;10,29) | 81,55(73,62;89,48) | 54,84(48,33;61,34) | 3,01(1,49;4,54) | 147,23(136,58;157,89) |
| female | 3,49(1,92;5,06) | 11,57(8,71;14,43) | 25,34(21,12;29,57) | 2,02(0,83;3,21) | 42,42(36,95;47,89) |
| both | 5,56(4,13;7) | 44,99(40,92;49,07) | 39,43(35,62;43,24) | 2,49(1,54;3,45) | 92,48(86,64;98,32) |
| 50-54 | male | 15,34(11,87;18,81) | 155,03(144;166,07) | 93,06(84,51;101,61) | 2,25(0,92;3,58) | 265,68(251,23;280,13) |
| female | 8,41(6;10,81) | 25,41(21,23;29,59) | 50,81(44,9;56,72) | 4,83(3,01;6,65) | 89,46(81,62;97,3) |
| both | 11,64(9,58;13,71) | 85,89(80,28;91,5) | 70,53(65,44;75,61) | 3,63(2,47;4,78) | 171,69(163,75;179,62) |
| 55-59 | male | 20,7(16,3;25,1) | 252,32(236,96;267,69) | 165,86(153,4;178,32) | 4,63(2,55;6,71) | 443,51(423,14;463,88) |
| female | 8,61(6,04;11,18) | 51,66(45,35;57,96) | 78,29(70,53;86,05) | 6,01(3,86;8,16) | 144,56(134,02;155,11) |
| both | 14,07(11,63;16,5) | 142,19(134,45;149,94) | 117,8(110,75;124,85) | 5,38(3,88;6,89) | 279,44(268,58;290,3) |
| 60-64 | male | 34,87(28;41,73) | 371,2(348,79;393,61) | 264,49(245,57;283,4) | 7,75(4,51;10,99) | 678,3(648,01;708,59) |
| female | 16,58(12,52;20,64) | 94,83(85,11;104,54) | 135,24(123,64;146,85) | 6,74(4,15;9,33) | 253,39(237,51;269,27) |
| both | 24,33(20,6;28,07) | 211,97(200,94;222,99) | 190,03(179,59;200,46) | 7,17(5,14;9,19) | 433,49(417,72;449,26) |
| 65-69 | male | 52,88(42,46;63,3) | 513,31(480,86;545,77) | 402,74(374;431,49) | 8,55(4,36;12,73) | 977,48(932,7;1022,27) |
| female | 25,16(19,35;30,97) | 196,75(180,49;213) | 225,75(208,34;243,16) | 5,94(3,12;8,76) | 453,6(428,92;478,28) |
| both | 36,12(30,71;41,54) | 321,95(305,78;338,11) | 295,75(280,26;311,24) | 6,97(4,59;9,35) | 660,79(637,64;683,95) |
| 70-74 | male | 82,43(63,9;100,97) | 726,71(671,68;781,74) | 649,7(597,67;701,73) | 10,85(4,12;17,57) | 1469,69(1391,44;1547,95) |
| female | 48,88(38,03;59,73) | 372,26(342,32;402,2) | 426,78(394,73;458,84) | 11,28(6,07;16,49) | 859,2(813,72;904,68) |
| both | 61,17(51,51;70,83) | 502,06(474,38;529,74) | 508,42(480,56;536,27) | 11,12(7;15,24) | 1082,77(1042,12;1123,41) |
| 2016 | 0-4 | male | 0(0;0) | 0(0;0) | 3,91(2,68;5,14) | 0(0;0) | 3,91(2,68;5,14) |
| female | 0(0;0) | 0(0;0) | 2,23(1,28;3,19) | 0(0;0) | 2,23(1,28;3,19) |
| both | 0(0;0) | 0(0;0) | 3,1(2,31;3,88) | 0(0;0) | 3,1(2,31;3,88) |
| 5-9 | male | 0(0;0) | 0(0;0) | 0,11(-0,11;0,33) | 0(0;0) | 0,11(-0,11;0,33) |
| female | 0(0;0) | 0(0;0) | 0,36(-0,05;0,76) | 0(0;0) | 0,36(-0,05;0,76) |
| both | 0(0;0) | 0(0;0) | 0,23(0;0,46) | 0(0;0) | 0,23(0;0,46) |
| 10-14 | male | 0(0;0) | 0(0;0) | 0,45(-0,06;0,96) | 0(0;0) | 0,45(-0,06;0,96) |
| female | 0(0;0) | 0(0;0) | 0,16(-0,15;0,47) | 0(0;0) | 0,16(-0,15;0,47) |
| both | 0(0;0) | 0(0;0) | 0,31(0,01;0,61) | 0(0;0) | 0,31(0,01;0,61) |
| 15-19 | male | 0(0;0) | 0,35(-0,14;0,84) | 0,7(0,01;1,39) | 0(0;0) | 1,05(0,21;1,89) |
| female | 0(0;0) | 0(0;0) | 1,1(0,22;1,98) | 0(0;0) | 1,1(0,22;1,98) |
| both | 0(0;0) | 0,18(-0,07;0,43) | 0,9(0,34;1,45) | 0(0;0) | 1,07(0,47;1,68) |
| 20-24 | male | 0(0;0) | 1,02(0,26;1,77) | 0,87(0,17;1,57) | 0(0;0) | 1,89(0,86;2,91) |
| female | 0(0;0) | 0,6(0,01;1,19) | 0,15(-0,14;0,44) | 0,15(-0,14;0,44) | 0,9(0,18;1,62) |
| both | 0(0;0) | 0,81(0,33;1,29) | 0,52(0,13;0,9) | 0,07(-0,07;0,22) | 1,4(0,77;2,03) |
| 25-29 | male | 0,25(-0,1;0,59) | 3,12(1,89;4,34) | 3,62(2,3;4,93) | 0,12(-0,12;0,37) | 7,11(5,26;8,95) |
| female | 0(0;0) | 0,24(-0,09;0,58) | 1,22(0,46;1,98) | 0,12(-0,12;0,36) | 1,59(0,72;2,45) |
| both | 0,12(-0,05;0,29) | 1,67(1,04;2,29) | 2,41(1,65;3,16) | 0,12(-0,05;0,29) | 4,32(3,31;5,33) |
| 30-34 | male | 0,41(-0,05;0,88) | 6,5(4,64;8,36) | 6,08(4,29;7,88) | 0,28(-0,11;0,66) | 13,27(10,62;15,93) |
| female | 0(0;0) | 1,76(0,8;2,72) | 2,84(1,63;4,06) | 0,41(-0,05;0,87) | 5,01(3,4;6,63) |
| both | 0,21(-0,03;0,44) | 4,1(3,07;5,14) | 4,45(3,37;5,53) | 0,34(0,04;0,64) | 9,1(7,55;10,65) |
| 35-39 | male | 2,12(0,97;3,28) | 16(12,83;19,16) | 12,4(9,62;15,19) | 0,65(0,01;1,29) | 31,17(26,75;35,6) |
| female | 0,95(0,19;1,71) | 4,42(2,78;6,06) | 7,11(5,03;9,18) | 0,32(-0,12;0,75) | 12,79(10;15,57) |
| both | 1,52(0,84;2,21) | 10,11(8,35;11,88) | 9,71(7,98;11,44) | 0,48(0,1;0,87) | 21,83(19,24;24,42) |
| 40-44 | male | 2,9(1,48;4,33) | 43,18(37,69;48,67) | 30,12(25,54;34,7) | 0,91(0,11;1,7) | 77,11(69,78;84,44) |
| female | 1,18(0,31;2,06) | 5,91(3,95;7,87) | 16,55(13,27;19,83) | 0,51(-0,07;1,08) | 24,15(20,19;28,11) |
| both | 2,01(1,19;2,83) | 23,88(21,05;26,71) | 23,09(20,3;25,88) | 0,7(0,21;1,18) | 49,68(45,59;53,76) |
| 45-49 | male | 5,95(3,82;8,08) | 75,16(67,59;82,72) | 56,91(50,33;63,5) | 2,18(0,89;3,47) | 140,2(129,87;150,53) |
| female | 2,73(1,35;4,1) | 14,9(11,67;18,12) | 26,35(22,06;30,63) | 1,09(0,22;1,96) | 45,06(39,45;50,67) |
| both | 4,27(3,02;5,51) | 43,71(39,72;47,7) | 40,96(37,1;44,82) | 1,61(0,85;2,38) | 90,55(84,81;96,29) |
| 50-54 | male | 11,19(8,21;14,18) | 143,44(132,75;154,12) | 108,41(99,12;117,7) | 1,45(0,38;2,53) | 264,49(249,97;279) |
| female | 3,27(1,76;4,78) | 27,27(22,91;31,63) | 43,27(37,77;48,77) | 4,91(3,06;6,76) | 78,72(71,3;86,13) |
| both | 6,97(5,36;8,58) | 81,55(76,04;87,06) | 73,7(68,47;78,94) | 3,29(2,19;4,4) | 165,52(157,67;173,37) |
| 55-59 | male | 19,06(14,94;23,19) | 235,96(221,44;250,47) | 163,66(151,57;175,75) | 5,11(2,98;7,25) | 423,79(404,34;443,25) |
| female | 9,04(6,46;11,63) | 47,7(41,77;53,64) | 67,32(60,27;74,38) | 3,65(2,01;5,3) | 127,72(118,01;137,44) |
| both | 13,58(11,24;15,92) | 132,94(125,61;140,27) | 110,94(104,25;117,64) | 4,32(2,99;5,64) | 261,78(251,49;272,07) |
| 60-64 | male | 27,36(21,4;33,32) | 359,36(337,77;380,96) | 261,42(243;279,83) | 10,13(6,51;13,76) | 658,27(629,05;687,5) |
| female | 14,53(10,79;18,27) | 94,72(85,17;104,27) | 131,55(120,3;142,81) | 6,77(4,21;9,32) | 247,57(232,13;263,01) |
| both | 20(16,67;23,32) | 207,43(196,73;218,14) | 186,86(176,7;197,03) | 8,2(6,07;10,33) | 422,49(407,21;437,77) |
| 65-69 | male | 38,69(30,11;47,28) | 551,12(518,72;583,53) | 396,35(368,87;423,84) | 7,44(3,68;11,21) | 993,61(950,1;1037,12) |
| female | 23,94(18,49;29,4) | 182,47(167,41;197,53) | 206,09(190,08;222,09) | 6,15(3,38;8,91) | 418,64(395,83;441,45) |
| both | 29,76(25,03;34,5) | 327,99(312,29;343,7) | 281,19(266,65;295,74) | 6,66(4,42;8,9) | 645,61(623,57;667,65) |
| 70-74 | male | 54,94(39,71;70,17) | 626,32(574,9;677,74) | 598,85(548,57;649,13) | 5,49(0,68;10,31) | 1285,6(1211,93;1359,27) |
| female | 36,71(27,18;46,25) | 267,31(241,59;293,03) | 333,01(304,3;361,71) | 7,73(3,36;12,1) | 644,76(604,81;684,7) |
| both | 43,45(35,22;51,68) | 399,98(375;424,96) | 431,25(405,31;457,19) | 6,9(3,62;10,18) | 881,59(844,5;918,67) |
| 2017 | 0-4 | male | 0(0;0) | 0(0;0) | 1,39(0,66;2,12) | 0,1(-0,1;0,29) | 1,49(0,74;2,25) |
| female | 0(0;0) | 0(0;0) | 1,16(0,48;1,85) | 0(0;0) | 1,16(0,48;1,85) |
| both | 0(0;0) | 0(0;0) | 1,28(0,78;1,78) | 0,05(-0,05;0,15) | 1,33(0,82;1,84) |
| 5-9 | male | 0(0;0) | 0(0;0) | 0,33(-0,04;0,7) | 0(0;0) | 0,33(-0,04;0,7) |
| female | 0(0;0) | 0(0;0) | 0,23(-0,09;0,55) | 0(0;0) | 0,23(-0,09;0,55) |
| both | 0(0;0) | 0(0;0) | 0,28(0,03;0,53) | 0(0;0) | 0,28(0,03;0,53) |
| 10-14 | male | 0(0;0) | 0,14(-0,14;0,42) | 0,14(-0,14;0,42) | 0(0;0) | 0,28(-0,11;0,68) |
| female | 0(0;0) | 0,3(-0,12;0,71) | 0,75(0,09;1,4) | 0(0;0) | 1,05(0,27;1,82) |
| both | 0(0;0) | 0,22(-0,03;0,46) | 0,44(0,09;0,79) | 0(0;0) | 0,65(0,23;1,08) |
| 15-19 | male | 0,17(-0,17;0,52) | 0(0;0) | 1,57(0,55;2,6) | 0(0;0) | 1,75(0,66;2,83) |
| female | 0(0;0) | 0(0;0) | 0,37(-0,14;0,87) | 0,37(-0,14;0,87) | 0,73(0,01;1,45) |
| both | 0,09(-0,09;0,26) | 0(0;0) | 0,98(0,4;1,56) | 0,18(-0,07;0,43) | 1,25(0,6;1,91) |
| 20-24 | male | 0(0;0) | 0,46(-0,06;0,98) | 2,75(1,48;4,02) | 0(0;0) | 3,2(1,83;4,58) |
| female | 0(0;0) | 0,32(-0,12;0,76) | 0,48(-0,06;1,01) | 0(0;0) | 0,79(0,1;1,49) |
| both | 0(0;0) | 0,39(0,05;0,73) | 1,63(0,93;2,33) | 0(0;0) | 2,02(1,24;2,8) |
| 25-29 | male | 0,13(-0,12;0,38) | 2,79(1,62;3,96) | 3,05(1,83;4,26) | 0,13(-0,12;0,38) | 6,09(4,37;7,81) |
| female | 0(0;0) | 0,63(0,08;1,18) | 0,88(0,23;1,53) | 0,38(-0,05;0,8) | 1,88(0,93;2,83) |
| both | 0,06(-0,06;0,19) | 1,7(1,06;2,34) | 1,95(1,27;2,64) | 0,25(0,01;0,5) | 3,97(2,99;4,95) |
| 30-34 | male | 0,27(-0,1;0,64) | 5,06(3,45;6,67) | 7,46(5,51;9,42) | 0,13(-0,13;0,39) | 12,93(10,35;15,5) |
| female | 0(0;0) | 1,96(0,97;2,94) | 3,65(2,3;5) | 0,39(-0,05;0,83) | 6(4,26;7,73) |
| both | 0,13(-0,05;0,31) | 3,49(2,55;4,43) | 5,53(4,35;6,72) | 0,26(0,01;0,52) | 9,42(7,88;10,97) |
| 35-39 | male | 1,6(0,61;2,59) | 15,69(12,58;18,8) | 15,85(12,73;18,97) | 0,32(-0,12;0,76) | 33,46(28,93;38) |
| female | 0,78(0,1;1,46) | 2,64(1,39;3,9) | 9,01(6,69;11,33) | 0,62(0,01;1,23) | 13,05(10,26;15,84) |
| both | 1,18(0,58;1,78) | 9,07(7,41;10,72) | 12,38(10,44;14,31) | 0,47(0,09;0,85) | 23,1(20,46;25,75) |
| 40-44 | male | 2,33(1,07;3,6) | 35,2(30,27;40,13) | 32,51(27,77;37,24) | 1,8(0,68;2,91) | 71,84(64,8;78,88) |
| female | 1,01(0,2;1,81) | 7,22(5,06;9,38) | 15,11(11,99;18,23) | 0,67(0,01;1,33) | 24,01(20,07;27,94) |
| both | 1,65(0,91;2,39) | 20,74(18,11;23,37) | 23,51(20,71;26,31) | 1,21(0,58;1,85) | 47,11(43,15;51,08) |
| 45-49 | male | 4,11(2,35;5,87) | 72,87(65,47;80,28) | 61,51(54,71;68,31) | 1,37(0,36;2,39) | 139,87(129,61;150,12) |
| female | 2,15(0,93;3,37) | 14,16(11,04;17,29) | 27,97(23,58;32,36) | 1,43(0,44;2,43) | 45,72(40,11;51,33) |
| both | 3,09(2,04;4,14) | 42,22(38,32;46,11) | 44(40,02;47,97) | 1,4(0,69;2,11) | 90,71(85;96,42) |
| 50-54 | male | 9,03(6,33;11,73) | 135,21(124,77;145,65) | 100,99(91,96;110,01) | 3,36(1,71;5,01) | 248,59(234,43;262,75) |
| female | 2,4(1,1;3,71) | 26,82(22,46;31,19) | 47,17(41,38;52,96) | 2,03(0,83;3,24) | 78,44(70,97;85,9) |
| both | 5,51(4,06;6,95) | 77,59(72,18;83,01) | 72,38(67,15;77,61) | 2,66(1,65;3,66) | 158,13(150,41;165,86) |
| 55-59 | male | 11,7(8,52;14,88) | 221,64(207,8;235,48) | 168,09(156,03;180,14) | 5,18(3,06;7,29) | 406,6(387,86;425,35) |
| female | 7,11(4,85;9,37) | 46,78(40,98;52,58) | 72,23(65,02;79,43) | 2,25(0,97;3,52) | 128,37(118,76;137,97) |
| both | 9,19(7,3;11,09) | 126,17(119,14;133,21) | 115,75(109,01;122,49) | 3,58(2,39;4,76) | 254,69(244,7;264,69) |
| 60-64 | male | 24,73(19,21;30,25) | 333,03(312,76;353,3) | 251,14(233,54;268,74) | 7,39(4,37;10,41) | 616,29(588,72;643,86) |
| female | 8,9(6,03;11,77) | 90,48(81,33;99,62) | 114,54(104,25;124,83) | 6,26(3,85;8,66) | 220,18(205,91;234,44) |
| both | 15,68(12,8;18,56) | 194,37(184,24;204,51) | 173,05(163,49;182,61) | 6,74(4,85;8,63) | 389,84(375,49;404,2) |
| 65-69 | male | 37,78(29,5;46,06) | 510,49(480,06;540,92) | 415,57(388,11;443,03) | 4,72(1,8;7,65) | 968,56(926,64;1010,48) |
| female | 16,35(11,95;20,75) | 172,16(157,88;186,45) | 208,26(192,55;223,97) | 6,48(3,71;9,25) | 403,25(381,39;425,12) |
| both | 24,82(20,6;29,04) | 305,86(291,05;320,66) | 290,18(275,76;304,6) | 5,78(3,75;7,82) | 626,64(605,45;647,84) |
| 70-74 | male | 34,35(22,8;45,9) | 627,38(578,03;676,72) | 582,93(535,36;630,49) | 9,09(3,15;15,03) | 1253,75(1183,99;1323,5) |
| female | 24,47(16,98;31,95) | 239,29(215,87;262,71) | 301,35(275,07;327,63) | 6,56(2,68;10,44) | 571,67(535,47;607,87) |
| both | 28,14(21,77;34,5) | 383,4(359,89;406,9) | 405,91(381,72;430,09) | 7,5(4,21;10,79) | 824,94(790,46;859,43) |
| 2018 | 0-4 | male | 0,1(-0,09;0,29) | 0,2(-0,08;0,47) | 2,37(1,42;3,32) | 0(0;0) | 2,67(1,66;3,68) |
| female | 0,11(-0,1;0,31) | 0,21(-0,08;0,5) | 2,11(1,18;3,03) | 0,11(-0,1;0,31) | 2,53(1,52;3,54) |
| both | 0,1(-0,04;0,24) | 0,2(0;0,4) | 2,24(1,58;2,91) | 0,05(-0,05;0,15) | 2,6(1,89;3,31) |
| 5-9 | male | 0(0;0) | 0(0;0) | 0,32(-0,04;0,68) | 0(0;0) | 0,32(-0,04;0,68) |
| female | 0(0;0) | 0(0;0) | 0,34(-0,04;0,72) | 0(0;0) | 0,34(-0,04;0,72) |
| both | 0(0;0) | 0(0;0) | 0,33(0,07;0,59) | 0(0;0) | 0,33(0,07;0,59) |
| 10-14 | male | 0(0;0) | 0(0;0) | 0,53(0,01;1,05) | 0(0;0) | 0,53(0,01;1,05) |
| female | 0(0;0) | 0(0;0) | 0,28(-0,11;0,67) | 0(0;0) | 0,28(-0,11;0,67) |
| both | 0(0;0) | 0(0;0) | 0,41(0,08;0,74) | 0(0;0) | 0,41(0,08;0,74) |
| 15-19 | male | 0(0;0) | 0,51(-0,07;1,1) | 0,69(0,01;1,36) | 0(0;0) | 1,2(0,31;2,09) |
| female | 0(0;0) | 0,18(-0,17;0,53) | 1,26(0,33;2,19) | 0(0;0) | 1,44(0,44;2,43) |
| both | 0(0;0) | 0,35(0,01;0,69) | 0,96(0,39;1,53) | 0(0;0) | 1,32(0,65;1,98) |
| 20-24 | male | 0(0;0) | 0,96(0,19;1,74) | 0,8(0,1;1,51) | 0,16(-0,15;0,48) | 1,93(0,84;3,02) |
| female | 0(0;0) | 0,17(-0,16;0,49) | 1(0,2;1,8) | 0(0;0) | 1,17(0,3;2,03) |
| both | 0(0;0) | 0,57(0,15;1) | 0,9(0,37;1,43) | 0,08(-0,08;0,24) | 1,56(0,86;2,26) |
| 25-29 | male | 0,26(-0,1;0,62) | 2,99(1,77;4,22) | 2,6(1,46;3,74) | 0(0;0) | 5,86(4,15;7,57) |
| female | 0(0;0) | 1,04(0,32;1,76) | 1,56(0,68;2,44) | 0(0;0) | 2,6(1,46;3,74) |
| both | 0,13(-0,05;0,31) | 2,02(1,31;2,73) | 2,08(1,36;2,8) | 0(0;0) | 4,23(3,2;5,26) |
| 30-34 | male | 0(0;0) | 6,09(4,35;7,83) | 6,09(4,35;7,83) | 0,13(-0,12;0,38) | 12,3(9,83;14,77) |
| female | 0(0;0) | 1,14(0,39;1,88) | 2,53(1,42;3,63) | 0(0;0) | 3,66(2,33;4,99) |
| both | 0(0;0) | 3,58(2,64;4,52) | 4,28(3,26;5,31) | 0,06(-0,06;0,19) | 7,93(6,53;9,32) |
| 35-39 | male | 0,78(0,1;1,47) | 16,1(12,99;19,21) | 14,22(11,3;17,14) | 0,31(-0,12;0,75) | 31,41(27,07;35,76) |
| female | 0,3(-0,12;0,73) | 2,74(1,47;4) | 6,99(4,97;9,01) | 0,76(0,09;1,43) | 10,79(8,28;13,3) |
| both | 0,54(0,14;0,94) | 9,32(7,66;10,99) | 10,56(8,79;12,32) | 0,54(0,14;0,94) | 20,96(18,47;23,45) |
| 40-44 | male | 1,77(0,67;2,87) | 32,82(28,09;37,55) | 28,03(23,66;32,4) | 1,06(0,21;1,92) | 63,68(57,1;70,27) |
| female | 0,5(-0,07;1,07) | 10(7,47;12,53) | 13,67(10,71;16,62) | 0,83(0,1;1,56) | 25(21;29) |
| both | 1,12(0,51;1,72) | 21,05(18,42;23,69) | 20,62(18,01;23,23) | 0,95(0,39;1,5) | 43,74(39,94;47,54) |
| 45-49 | male | 3,87(2,18;5,57) | 73,03(65,66;80,4) | 56,18(49,71;62,64) | 1,94(0,74;3,14) | 135,02(124,99;145,04) |
| female | 2,3(1,05;3,56) | 15,06(11,86;18,26) | 28,88(24,44;33,31) | 1,77(0,67;2,87) | 48,01(42,29;53,73) |
| both | 3,05(2,01;4,1) | 42,75(38,85;46,65) | 41,92(38,06;45,78) | 1,85(1,04;2,66) | 89,57(83,93;95,21) |
| 50-54 | male | 6,79(4,44;9,15) | 135,47(124,95;145,98) | 97,25(88,34;106,15) | 1,7(0,52;2,88) | 241,2(227,18;255,23) |
| female | 3,56(1,96;5,17) | 25,7(21,4;30,01) | 53,09(46,91;59,28) | 2,25(0,98;3,53) | 84,61(76,8;92,42) |
| both | 5,08(3,69;6,47) | 77,19(71,76;82,63) | 73,81(68,49;79,12) | 1,99(1,12;2,87) | 158,07(150,29;165,85) |
| 55-59 | male | 13,2(9,86;16,54) | 221,59(207,91;235,28) | 153,38(141,99;164,76) | 3,52(1,8;5,25) | 391,69(373,5;409,89) |
| female | 6,81(4,62;9,01) | 48,61(42,74;54,47) | 74,01(66,78;81,25) | 3,87(2,21;5,52) | 133,3(123,59;143,01) |
| both | 9,72(7,79;11,66) | 127,41(120,4;134,41) | 110,17(103,65;116,68) | 3,71(2,51;4,9) | 251,01(241,18;260,84) |
| 60-64 | male | 18,59(13,92;23,25) | 347,66(327,49;367,83) | 253,2(235,99;270,42) | 4,27(2,03;6,5) | 623,72(596,7;650,74) |
| female | 9,21(6,36;12,07) | 89,12(80,24;98) | 103,86(94,27;113,44) | 4,38(2,41;6,34) | 206,56(193,05;220,08) |
| both | 13,25(10,66;15,83) | 200,41(190,36;210,46) | 168,14(158,94;177,35) | 4,33(2,85;5,8) | 386,13(372,18;400,08) |
| 65-69 | male | 29,35(22,21;36,48) | 482,21(453,29;511,13) | 416,29(389,42;443,16) | 3,61(1,11;6,12) | 931,47(891,27;971,66) |
| female | 13,35(9,45;17,26) | 153,71(140,48;166,95) | 186,65(172,07;201,24) | 6,83(4,04;9,61) | 360,55(340,27;380,82) |
| both | 19,7(16,02;23,38) | 283,99(270,01;297,97) | 277,72(263,9;291,55) | 5,55(3,6;7,5) | 586,96(566,87;607,06) |
| 70-74 | male | 29,37(20,88;37,86) | 431(398,49;463,52) | 349,91(320,61;379,21) | 1,92(-0,25;4,08) | 812,2(767,56;856,83) |
| female | 27,42(19,03;35,82) | 320,37(291,68;349,06) | 351,81(321,74;381,87) | 8,03(3,48;12,57) | 707,63(664,99;750,27) |
| both | 28,42(22,45;34,39) | 376,97(355,22;398,72) | 350,84(329,85;371,82) | 4,9(2,42;7,38) | 761,12(730,22;792,03) |
| 2019 | 0-4 | male | 0(0;0) | 0,1(-0,09;0,29) | 4,52(3,21;5,83) | 0(0;0) | 4,62(3,3;5,94) |
| female | 0(0;0) | 0(0;0) | 2,62(1,59;3,64) | 0,1(-0,1;0,31) | 2,72(1,68;3,77) |
| both | 0(0;0) | 0,05(-0,05;0,15) | 3,6(2,76;4,44) | 0,05(-0,05;0,15) | 3,7(2,85;4,55) |
| 5-9 | male | 0,1(-0,1;0,31) | 0(0;0) | 0,42(0,01;0,83) | 0(0;0) | 0,52(0,06;0,98) |
| female | 0(0;0) | 0(0;0) | 0,22(-0,09;0,53) | 0(0;0) | 0,22(-0,09;0,53) |
| both | 0,05(-0,05;0,16) | 0(0;0) | 0,32(0,06;0,58) | 0(0;0) | 0,38(0,1;0,65) |
| 10-14 | male | 0(0;0) | 0(0;0) | 0,5(0,01;1) | 0(0;0) | 0,5(0,01;1) |
| female | 0(0;0) | 0(0;0) | 0,8(0,16;1,44) | 0(0;0) | 0,8(0,16;1,44) |
| both | 0(0;0) | 0(0;0) | 0,65(0,25;1,05) | 0(0;0) | 0,65(0,25;1,05) |
| 15-19 | male | 0,17(-0,16;0,49) | 0,66(0,01;1,31) | 0,83(0,1;1,55) | 0(0;0) | 1,66(0,63;2,68) |
| female | 0(0;0) | 0,35(-0,13;0,83) | 0,52(-0,07;1,11) | 0(0;0) | 0,87(0,11;1,63) |
| both | 0,08(-0,08;0,25) | 0,51(0,1;0,92) | 0,68(0,21;1,15) | 0(0;0) | 1,27(0,63;1,92) |
| 20-24 | male | 0,17(-0,16;0,5) | 0,67(0,01;1,33) | 1,01(0,2;1,82) | 0(0;0) | 1,85(0,76;2,94) |
| female | 0(0;0) | 0,18(-0,17;0,52) | 0,88(0,11;1,64) | 0(0;0) | 1,05(0,21;1,89) |
| both | 0,09(-0,08;0,25) | 0,43(0,05;0,8) | 0,94(0,39;1,5) | 0(0;0) | 1,46(0,76;2,15) |
| 25-29 | male | 0,4(-0,05;0,86) | 1,88(0,9;2,87) | 2,29(1,2;3,37) | 0,27(-0,1;0,64) | 4,84(3,26;6,42) |
| female | 0(0;0) | 1,09(0,33;1,84) | 1,63(0,71;2,55) | 0(0;0) | 2,72(1,53;3,91) |
| both | 0,2(-0,03;0,43) | 1,49(0,87;2,11) | 1,96(1,25;2,67) | 0,14(-0,05;0,32) | 3,79(2,79;4,78) |
| 30-34 | male | 0,25(-0,1;0,61) | 6,36(4,59;8,12) | 6,99(5,14;8,84) | 0,13(-0,12;0,38) | 13,73(11,14;16,32) |
| female | 0,25(-0,1;0,59) | 1,85(0,92;2,79) | 2,84(1,68;4,01) | 0,12(-0,12;0,37) | 5,07(3,52;6,62) |
| both | 0,25(0,01;0,5) | 4,07(3,08;5,06) | 4,89(3,8;5,97) | 0,13(-0,05;0,3) | 9,34(7,84;10,84) |
| 35-39 | male | 1,06(0,28;1,85) | 12,01(9,36;14,66) | 15,05(12,09;18,02) | 0,46(-0,06;0,97) | 28,59(24,5;32,67) |
| female | 0,74(0,09;1,39) | 3,26(1,9;4,62) | 7,25(5,22;9,29) | 0,3(-0,11;0,71) | 11,55(8,99;14,11) |
| both | 0,9(0,39;1,41) | 7,58(6,1;9,05) | 11,1(9,31;12,89) | 0,38(0,05;0,7) | 19,95(17,56;22,35) |
| 40-44 | male | 1,22(0,32;2,13) | 33,19(28,47;37,91) | 27,25(22,98;31,53) | 0,17(-0,17;0,52) | 61,84(55,4;68,29) |
| female | 0,5(-0,07;1,06) | 7,26(5,12;9,41) | 15,19(12,08;18,29) | 0,5(-0,07;1,06) | 23,44(19,58;27,3) |
| both | 0,85(0,32;1,37) | 19,86(17,32;22,41) | 21,05(18,43;23,67) | 0,34(0,01;0,67) | 42,1(38,39;45,8) |
| 45-49 | male | 3,26(1,71;4,82) | 77,78(70,21;85,36) | 62,8(55,99;69,61) | 1,34(0,35;2,34) | 145,19(134,84;155,54) |
| female | 2,63(1,3;3,96) | 11,76(8,94;14,57) | 27,02(22,76;31,29) | 1,4(0,43;2,38) | 42,82(37,44;48,19) |
| both | 2,93(1,92;3,95) | 43,28(39,38;47,18) | 44,11(40,16;48,05) | 1,38(0,68;2,07) | 91,7(86,01;97,38) |
| 50-54 | male | 6,18(3,93;8,43) | 127,43(117,22;137,65) | 96,32(87,44;105,2) | 1,07(0,13;2) | 231(217,25;244,75) |
| female | 3,21(1,68;4,74) | 22,1(18,1;26,1) | 39,29(33,95;44,63) | 2,08(0,85;3,31) | 66,68(59,72;73,63) |
| both | 4,61(3,28;5,94) | 71,6(66,35;76,84) | 66,09(61,05;71,13) | 1,6(0,82;2,39) | 143,89(136,45;151,33) |
| 55-59 | male | 11,14(8,08;14,2) | 209,05(195,81;222,3) | 143,3(132,33;154,27) | 2,62(1,14;4,1) | 366,12(348,59;383,64) |
| female | 5,14(3,24;7,05) | 42,04(36,6;47,49) | 60,96(54,4;67,51) | 2,57(1,22;3,92) | 110,71(101,88;119,55) |
| both | 7,88(6,14;9,62) | 118,31(111,58;125,05) | 98,56(92,41;104,71) | 2,59(1,6;3,59) | 227,35(218,01;236,68) |
| 60-64 | male | 20,2(15,47;24,94) | 330,17(311,04;349,3) | 238,68(222,41;254,95) | 4,33(2,14;6,52) | 593,38(567,73;619,03) |
| female | 7,26(4,78;9,73) | 78,74(70,58;86,89) | 100,07(90,88;109,27) | 3,74(1,96;5,52) | 189,81(177,14;202,47) |
| both | 12,86(10,37;15,34) | 187,48(178;196,96) | 160,02(151,26;168,78) | 3,99(2,61;5,38) | 364,34(351,13;377,56) |
| 65-69 | male | 22,55(16,42;28,68) | 479,25(450,99;507,51) | 382,53(357,29;407,78) | 4,77(1,95;7,59) | 889,1(850,61;927,59) |
| female | 18,38(13,88;22,89) | 153,95(140,92;166,98) | 178,08(164,06;192,1) | 5,46(3;7,91) | 355,87(336,05;375,68) |
| both | 20,04(16,4;23,69) | 283,55(269,83;297,27) | 259,53(246,41;272,66) | 5,18(3,33;7,04) | 568,31(548,89;587,73) |
| 70-74 | male | 25,95(18,37;33,54) | 385,86(356,62;415,1) | 383,56(354,4;412,71) | 2,31(0,05;4,57) | 797,68(755,64;839,72) |
| female | 22,05(15,22;28,89) | 273,47(249,41;297,54) | 353,97(326,59;381,35) | 8,82(4,5;13,14) | 658,32(620,98;695,66) |
| both | 23,96(18,87;29,05) | 328,4(309,54;347,26) | 368,43(348,46;388,4) | 5,64(3,17;8,11) | 726,43(698,38;754,48) |
| 2020 | 0-4 | male | 0,19(-0,07;0,46) | 0,19(-0,07;0,46) | 3,1(2,03;4,18) | 0(0;0) | 3,49(2,35;4,63) |
| female | 0(0;0) | 0(0;0) | 1,65(0,84;2,46) | 0(0;0) | 1,65(0,84;2,46) |
| both | 0,1(-0,04;0,24) | 0,1(-0,04;0,24) | 2,4(1,72;3,08) | 0(0;0) | 2,6(1,89;3,31) |
| 5-9 | male | 0(0;0) | 0(0;0) | 0,41(0,01;0,81) | 0,1(-0,1;0,3) | 0,51(0,06;0,96) |
| female | 0(0;0) | 0(0;0) | 0,65(0,13;1,17) | 0(0;0) | 0,65(0,13;1,17) |
| both | 0(0;0) | 0(0;0) | 0,53(0,2;0,86) | 0,05(-0,05;0,16) | 0,58(0,24;0,92) |
| 10-14 | male | 0(0;0) | 0(0;0) | 0,12(-0,11;0,35) | 0(0;0) | 0,12(-0,11;0,35) |
| female | 0(0;0) | 0(0;0) | 0,51(0,01;1) | 0(0;0) | 0,51(0,01;1) |
| both | 0(0;0) | 0(0;0) | 0,31(0,04;0,58) | 0(0;0) | 0,31(0,04;0,58) |
| 15-19 | male | 0(0;0) | 0,32(-0,12;0,76) | 0,64(0,01;1,26) | 0(0;0) | 0,95(0,19;1,71) |
| female | 0(0;0) | 0(0;0) | 0,17(-0,16;0,49) | 0(0;0) | 0,17(-0,16;0,49) |
| both | 0(0;0) | 0,16(-0,06;0,39) | 0,41(0,05;0,76) | 0(0;0) | 0,57(0,15;0,99) |
| 20-24 | male | 0(0;0) | 1,04(0,21;1,88) | 1,04(0,21;1,88) | 0(0;0) | 2,09(0,91;3,27) |
| female | 0,18(-0,17;0,54) | 0,18(-0,17;0,54) | 0,91(0,11;1,7) | 0(0;0) | 1,27(0,33;2,21) |
| both | 0,09(-0,09;0,26) | 0,62(0,16;1,08) | 0,98(0,4;1,55) | 0(0;0) | 1,69(0,93;2,44) |
| 25-29 | male | 0,28(-0,11;0,67) | 2,66(1,46;3,85) | 2,38(1,25;3,51) | 0(0;0) | 5,32(3,63;7,01) |
| female | 0(0;0) | 0,86(0,17;1,55) | 2(0,95;3,05) | 0(0;0) | 2,86(1,61;4,12) |
| both | 0,14(-0,05;0,34) | 1,77(1,08;2,46) | 2,19(1,42;2,96) | 0(0;0) | 4,1(3,05;5,16) |
| 30-34 | male | 0,25(-0,1;0,6) | 5,3(3,69;6,9) | 7,06(5,21;8,91) | 0,13(-0,12;0,37) | 12,74(10,25;15,22) |
| female | 0,12(-0,12;0,36) | 1,59(0,73;2,46) | 3,56(2,26;4,85) | 0,12(-0,12;0,36) | 5,4(3,8;6,99) |
| both | 0,19(-0,02;0,4) | 3,42(2,52;4,32) | 5,28(4,16;6,41) | 0,12(-0,05;0,3) | 9,01(7,55;10,48) |
| 35-39 | male | 0,74(0,09;1,38) | 13,71(10,92;16,49) | 12,97(10,26;15,68) | 0(0;0) | 27,41(23,47;31,35) |
| female | 0,43(-0,06;0,92) | 3,73(2,3;5,16) | 6,88(4,94;8,83) | 0(0;0) | 11,04(8,58;13,51) |
| both | 0,58(0,18;0,98) | 8,65(7,1;10,2) | 9,88(8,22;11,55) | 0(0;0) | 19,12(16,8;21,43) |
| 40-44 | male | 3,61(2,07;5,15) | 34,02(29,29;38,76) | 33,17(28,49;37,84) | 0,34(-0,13;0,82) | 71,14(64,29;78) |
| female | 0,98(0,2;1,76) | 6,04(4,1;7,99) | 16,01(12,84;19,18) | 0,16(-0,16;0,48) | 23,2(19,38;27,01) |
| both | 2,26(1,41;3,11) | 19,68(17,16;22,2) | 24,37(21,57;27,17) | 0,25(-0,03;0,54) | 46,56(42,69;50,43) |
| 45-49 | male | 4,77(2,9;6,64) | 70,45(63,26;77,64) | 62,24(55,48;69) | 0,76(0,02;1,51) | 138,23(128,16;148,3) |
| female | 1,74(0,66;2,82) | 14,28(11,19;17,37) | 29,6(25,15;34,05) | 0,52(-0,07;1,11) | 46,14(40,59;51,7) |
| both | 3,19(2,13;4,24) | 41,07(37,28;44,86) | 45,17(41,19;49,14) | 0,64(0,17;1,11) | 90,07(84,45;95,68) |
| 50-54 | male | 10,79(7,83;13,76) | 132,71(122,32;143,1) | 105,83(96,55;115,11) | 2,33(0,95;3,7) | 251,66(237,36;265,97) |
| female | 3,21(1,68;4,73) | 27,9(23,41;32,4) | 49,4(43,41;55,38) | 1,13(0,23;2,04) | 81,63(73,95;89,32) |
| both | 6,78(5,17;8,39) | 77,28(71,84;82,72) | 75,98(70,59;81,38) | 1,7(0,89;2,5) | 161,74(153,87;169,61) |
| 55-59 | male | 15,43(11,82;19,05) | 232,82(218,78;246,86) | 168,66(156,71;180,61) | 1,76(0,54;2,99) | 418,68(399,85;437,51) |
| female | 7,05(4,81;9,29) | 50,28(44,29;56,26) | 70,31(63,23;77,39) | 2,78(1,37;4,19) | 130,42(120,78;140,06) |
| both | 10,88(8,83;12,93) | 133,69(126,5;140,88) | 115,25(108,57;121,93) | 2,32(1,37;3,26) | 262,14(252,07;272,21) |
| 60-64 | male | 20,76(16,1;25,43) | 354,89(335,59;374,19) | 272,93(256;289,85) | 3,01(1,23;4,78) | 651,59(625,44;677,74) |
| female | 10,51(7,6;13,42) | 100,66(91,65;109,68) | 116,63(106,93;126,34) | 3,57(1,87;5,27) | 231,38(217,71;245,04) |
| both | 14,97(12,35;17,58) | 211,2(201,38;221,01) | 184,59(175,41;193,77) | 3,33(2,09;4,56) | 414,08(400,33;427,82) |
| 65-69 | male | 35,71(28,12;43,31) | 515,11(486,28;543,95) | 438,22(411,63;464,82) | 4,2(1,6;6,81) | 993,25(953,21;1033,29) |
| female | 17,35(13,03;21,67) | 173,79(160,12;187,46) | 196,46(181,93;210,99) | 3,92(1,87;5,97) | 391,52(371;412,03) |
| both | 24,69(20,7;28,68) | 310,25(296,1;324,4) | 293,11(279,36;306,87) | 4,03(2,42;5,64) | 632,08(611,89;652,28) |
| 70-74 | male | 62,62(49,69;75,56) | 703,47(660,11;746,83) | 649,89(608,21;691,57) | 2,09(-0,27;4,45) | 1418,07(1356,5;1479,64) |
| female | 33,29(26,17;40,41) | 287,75(266,82;308,68) | 325,8(303,53;348,08) | 7,13(3,84;10,43) | 653,98(622,43;685,54) |
| both | 43,94(37,41;50,47) | 438,62(417,99;459,25) | 443,42(422,68;464,16) | 5,3(3,03;7,57) | 931,28(901,22;961,33) |
| 2021 | 0-4 | male | 0(0;0) | 0,18(-0,17;0,52) | 9,36(6,84;11,88) | 0(0;0) | 9,54(6,99;12,08) |
| female | 0(0;0) | 0(0;0) | 2,83(1,4;4,26) | 0,19(-0,18;0,56) | 3,02(1,54;4,5) |
| both | 0(0;0) | 0,09(-0,09;0,27) | 6,2(4,73;7,67) | 0,09(-0,09;0,27) | 6,38(4,89;7,88) |
| 5-9 | male | 0(0;0) | 0,19(-0,18;0,55) | 0,56(-0,07;1,2) | 0(0;0) | 0,75(0,01;1,48) |
| female | 0(0;0) | 0(0;0) | 0,6(-0,08;1,27) | 0(0;0) | 0,6(-0,08;1,27) |
| both | 0(0;0) | 0,1(-0,09;0,29) | 0,58(0,12;1,04) | 0(0;0) | 0,68(0,18;1,18) |
| 10-14 | male | 0(0;0) | 0(0;0) | 1,07(0,13;2,02) | 0(0;0) | 1,07(0,13;2,02) |
| female | 0(0;0) | 0(0;0) | 0,23(-0,22;0,67) | 0(0;0) | 0,23(-0,22;0,67) |
| both | 0(0;0) | 0(0;0) | 0,66(0,13;1,19) | 0(0;0) | 0,66(0,13;1,19) |
| 15-19 | male | 0,29(-0,27;0,85) | 0,57(-0,22;1,37) | 1,15(0,02;2,27) | 0(0;0) | 2(0,52;3,49) |
| female | 0(0;0) | 0,3(-0,29;0,89) | 2,72(0,94;4,5) | 0(0;0) | 3,02(1,15;4,89) |
| both | 0,15(-0,14;0,44) | 0,44(-0,06;0,94) | 1,91(0,87;2,95) | 0(0;0) | 2,5(1,31;3,69) |
| 20-24 | male | 0,32(-0,31;0,95) | 1,61(0,2;3,03) | 2,58(0,79;4,37) | 0(0;0) | 4,52(2,15;6,88) |
| female | 0(0;0) | 0,33(-0,32;0,98) | 2,32(0,6;4,04) | 0(0;0) | 2,66(0,82;4,5) |
| both | 0,16(-0,16;0,48) | 0,98(0,2;1,77) | 2,45(1,21;3,7) | 0(0;0) | 3,6(2,1;5,1) |
| 25-29 | male | 0,26(-0,25;0,76) | 3,07(1,33;4,81) | 7,68(4,93;10,43) | 0,26(-0,25;0,76) | 11,27(7,94;14,6) |
| female | 0,26(-0,24;0,76) | 0,51(-0,2;1,22) | 3,83(1,89;5,76) | 0,26(-0,24;0,76) | 4,85(2,67;7,03) |
| both | 0,26(-0,1;0,61) | 1,79(0,85;2,73) | 5,75(4,07;7,43) | 0,26(-0,1;0,61) | 8,05(6,06;10,04) |
| 30-34 | male | 0,22(-0,21;0,66) | 15,05(11,47;18,63) | 13,95(10,5;17,39) | 0,22(-0,21;0,66) | 29,44(24,44;34,45) |
| female | 0(0;0) | 1,68(0,52;2,84) | 5,03(3,02;7,05) | 0,21(-0,2;0,62) | 6,92(4,56;9,28) |
| both | 0,11(-0,1;0,32) | 8,18(6,34;10,02) | 9,37(7,4;11,34) | 0,22(-0,08;0,51) | 17,88(15,16;20,6) |
| 35-39 | male | 1,03(0,02;2,05) | 25,07(20,08;30,06) | 25,85(20,78;30,91) | 0(0;0) | 51,95(44,77;59,13) |
| female | 1,24(0,15;2,32) | 5,19(2,97;7,41) | 14,59(10,86;18,31) | 0,25(-0,24;0,73) | 21,26(16,77;25,76) |
| both | 1,14(0,39;1,88) | 14,91(12,22;17,6) | 20,09(16,97;23,22) | 0,13(-0,12;0,37) | 36,27(32,07;40,46) |
| 40-44 | male | 4,91(2,5;7,31) | 66,88(58,01;75,76) | 66,27(57,43;75,11) | 0,61(-0,24;1,46) | 138,68(125,89;151,46) |
| female | 2,89(1,1;4,69) | 19,09(14,48;23,7) | 27,19(21,69;32,68) | 0,58(-0,22;1,38) | 49,75(42,31;57,18) |
| both | 3,87(2,38;5,36) | 42,28(37,36;47,2) | 46,15(41,02;51,29) | 0,6(0,01;1,18) | 92,9(85,61;100,19) |
| 45-49 | male | 6,92(3,89;9,95) | 125,19(112,3;138,09) | 127,27(114,26;140,27) | 1,04(-0,14;2,21) | 260,41(241,81;279,01) |
| female | 4,36(2,08;6,64) | 28,96(23,07;34,84) | 61,96(53,35;70,57) | 2,8(0,97;4,63) | 98,08(87,25;108,91) |
| both | 5,57(3,7;7,44) | 74,55(67,7;81,4) | 92,9(85,25;100,55) | 1,97(0,85;3,08) | 174,99(164,49;185,48) |
| 50-54 | male | 14,21(9,63;18,79) | 242,73(223,8;261,65) | 190,49(173,73;207,26) | 3,46(1,2;5,71) | 450,89(425,1;476,68) |
| female | 9,5(5,98;13,02) | 55,97(47,43;64,51) | 87,52(76,84;98,19) | 2,37(0,62;4,13) | 155,36(141,13;169,59) |
| both | 11,71(8,86;14,55) | 143,56(133,59;153,52) | 135,81(126,12;145,51) | 2,88(1,47;4,29) | 293,96(279,7;308,22) |
| 55-59 | male | 25,28(18,99;31,57) | 432,23(406,21;458,25) | 318,87(296,52;341,22) | 3,67(1,27;6,07) | 780,05(745,09;815) |
| female | 14,27(9,95;18,58) | 110,75(98,73;122,77) | 125,36(112,57;138,15) | 6,79(3,82;9,77) | 257,18(238,86;275,5) |
| both | 19,27(15,57;22,98) | 256,86(243,34;270,38) | 213,31(200,99;225,63) | 5,37(3,42;7,33) | 494,82(476,05;513,59) |
| 60-64 | male | 43,76(34,72;52,8) | 696,26(660,2;732,33) | 525,11(493,8;556,43) | 4,38(1,52;7,23) | 1269,51(1220,82;1318,21) |
| female | 29,77(23,25;36,29) | 235,19(216,85;253,53) | 239,66(221,15;258,17) | 3,72(1,41;6,03) | 508,34(481,38;535,3) |
| both | 35,84(30,45;41,22) | 435,09(416,32;453,86) | 363,42(346,26;380,57) | 4,01(2,2;5,81) | 838,34(812,29;864,4) |
| 65-69 | male | 70,15(55,89;84,4) | 1113,28(1056,48;1170,08) | 825,91(776,99;874,83) | 2,26(-0,3;4,82) | 2011,6(1935,25;2087,94) |
| female | 31,88(24,07;39,7) | 513,14(481,8;544,48) | 398,06(370,46;425,66) | 10,46(5,99;14,94) | 953,55(910,83;996,27) |
| both | 47,1(39,74;54,47) | 751,86(722,43;781,3) | 568,25(542,66;593,84) | 7,2(4,32;10,08) | 1374,41(1334,61;1414,22) |
| 70-74 | male | 122,19(98,36;146,02) | 1725,2(1635,65;1814,74) | 1260,63(1184,08;1337,17) | 3,63(-0,48;7,74) | 3111,64(2991,39;3231,9) |
| female | 85,41(70,5;100,32) | 892,04(843,85;940,24) | 690,72(648,31;733,13) | 8,81(4,02;13,6) | 1676,99(1610,9;1743,07) |
| both | 98,62(85,79;111,45) | 1191,22(1146,63;1235,81) | 895,37(856,72;934,03) | 6,95(3,54;10,36) | 2192,16(2131,68;2252,65) |

Supplementary Figure 1. Trends in crude mortality from circulatory system (Chronic rheumatic heart disease (I05-I09); Hypertensive diseases (I10-I15); Ischaemic heart disease (I20-I25);
